# Supplementary material for: Lytic archaeal viruses infect abundant primary producers in Earth’s crust
Source: PubMed Central journal article supplement (PMC8324899; doi:10.1038/s41467-021-24803-4), 2021-07-30
Supplement: 41467_2021_24803_MOESM2_ESM.pdf [file 41467_2021_24803_MOESM2_ESM.pdf]

## Description of Additional Supplementary Files

File Name: Supplementary Data 1

Description: CRISPR Cas systems of highly abundant Altiarchaeota. CRISPR-associated proteins based on UniRef100 <sup>1</sup> annotations in assemblies and based on searches for a combination of the key words “Alti”, “Cas”, and “Alti”, “CRISPR”. The table also contains information on CRISPR arrays and associated Cas proteins detected by CRISPRcasFinder <sup>2</sup> in Altiarchaeota bins. ND=non detected.

File Name: Supplementary Data 2

Description: Variants derived by mapping reads from MSI biofilm (BF) 2012 and 2018 samples to 2012 genomes of Altivir\_1\_MSI and Altivir\_2\_MSI, respectively. Details on single nucleotide and other polymorphisms are given together with the information if variants affect a region matched by a spacer. Analysis has been conducted in Geneious Prime version v.11.1.5 <sup>3</sup>.

File Name: Supplementary Data 3

Description: Protein annotations of open reading frames on Altiarchaeota virus genomes. Functional annotations were performed via HHpred (<https://toolkit.tuebingen.mpg.de/tools/hhpred>) <sup>4, 5</sup> against PDB\_mmCIFC70\_4\_Feb, Pfam-A v.32.0, NCBI\_Conserved\_Domains\_v3.16 and TIGRFAMs v15.0 database. Moreover, DIAMOND v.0.9.9 against UniRef100 (Feb. 2018) <sup>1</sup>, HMM searches against Virus Orthologous Groups from VOGDB<sup>6</sup>, HHblits v3.3.0 against pVOGs <sup>7</sup> and InterProScan against InterPro database 82.0. For the most abundant viruses, e.g., Altivir\_1\_MSI and Altivir\_8\_HURL, PHMMER (PH, <https://www.ebi.ac.uk/Tools/hmmer/search/phmmer>) against reference proteomes <sup>8</sup>, and DELTA-BLAST (DB) <sup>9</sup> against NR were additionally used. MSI=Mühlbacher Schwefelquelle, Isling, ACLF=Alpena County Library Fountain, HURL=Horonobe Underground Research Laboratory, GA=Geyser Andernach
